# Supplementary material for: Genetic and Molecular Aspects of Drug-Induced QT Interval Prolongation
Source: MDPI journal article supplement (doi:10.3390/ijms22158090), 2021-07-28
Supplement: s1 [file s1]

## Supplementary Material

**Table S1.** Strong CYP inhibitors

| CYP Metabolizer | Strong CYP Inhibitors                                                                                                                                          |
|-----------------|----------------------------------------------------------------------------------------------------------------------------------------------------------------|
| 3A4             | Clarithromycin<br>Indinavir<br>Itraconazol<br>Ketoconazol<br>Nefazodone<br>Nelfinavir<br>Ritonavir<br>Saquinavir<br>Ceritinib<br>Telithromycin<br>Voriconazole |
| 2D6             | Bupropion<br>Cinacalcet<br>Fluoxetine<br>Paroxetine<br>Quinidine                                                                                               |
| 2C19            | Fluvoxamine<br>Ticlopidine                                                                                                                                     |
| 1A2             | Ciprofloxacin<br>Fluvoxamine                                                                                                                                   |
